# Supplementary material for: Assessing the Consequences of Denoising Marker-Based Metagenomic Data
Source: PubMed Central journal article supplement (PMC3607570; doi:10.1371/journal.pone.0060458), 2013-03-25
Supplement: pone.0060458.s001.pdf [file pone.0060458.s001.pdf]

| Flow:        | T    | A    | C    | G    | T    | A    | C    | G    |
|--------------|------|------|------|------|------|------|------|------|
| Flow values: | 1.91 | 0.01 | 1.66 | 0.19 | 0.46 | 0.06 | 1.90 | 1.93 |
| >Stage 0     | TT   |      | CC   |      | N    |      | CC   | GG   |
| >Stage 1A    | TT   |      | CC   |      |      |      | CC   | GG   |
| >Stage 2A    | TT   |      | CC   |      | T    |      | CC   | GG   |
