# Supplementary material for: Assessing the Consequences of Denoising Marker-Based Metagenomic Data
Source: PubMed Central journal article supplement (PMC3607570; doi:10.1371/journal.pone.0060458), 2013-03-25
Supplement: pone.0060458.s002.pdf [file pone.0060458.s002.pdf]

| Stage                               | Sequence file                        | Mapping file                            |
|-------------------------------------|--------------------------------------|-----------------------------------------|
| <u>AmpliconNoise</u>                |                                      |                                         |
| 1A                                  | <sample>.fa                          | N/A                                     |
| 2A                                  | <sample>_s60_c01_cd.fa               | <sample>_s60_c01.mapping                |
| 3A                                  | <sample>_s60_c01_cd_tr400.fa         | <sample>_s60_c01.mapping                |
| 4A                                  | all_s60_c01_cd_tr400_s30_c08_cd.fa   | all_s60_c01_cd_tr400_s30_c08_cd.mapping |
| 5A                                  | all_s60_c01_cd_tr400_s30_c08_Good.fa | all_s60_c01_cd_tr400_s30_c08_cd.mapping |
| <u>QIIME</u>                        |                                      |                                         |
| 1B                                  | seqs.fna                             | N/A                                     |
| 2B                                  | prefix_dereplicated.fasta            | prefix_mapping.txt                      |
| 3B <sup>1</sup> , 4B <sup>1,2</sup> | singletons.fasta, centroids.fasta    | denoiser_mapping.txt                    |
| <u>mothur</u>                       |                                      |                                         |
| 1C                                  | <bin>.flow.fasta                     | N/A                                     |
| 2C                                  | <bin>.flow.shhh.fasta                | <bin>.flow.shhh.names                   |
| 3C                                  | <bin>.flow.shhh.trim.fasta           | <bin>.flow.shhh.trim.names              |
| 4C, 5C <sup>3</sup>                 | <bin>.flow.shhh.trim.shhh.fasta      | <bin>.flow.shhh.trim.shhh.names         |
| <u>SLP</u>                          |                                      |                                         |
| 1D                                  | seqs.fna                             | N/A                                     |
| 2D                                  | seqs.unique.slp.unique.fa            | seqs.unique.slp.names                   |
| <u>Acacia</u>                       |                                      |                                         |
| 1E                                  | <bin>_all_tags.seqOut                | N/A                                     |

<sup>1</sup>Reconstituting performed by inflate\_denoiser\_output.py.

<sup>2</sup>Chimeric reads excluded based on output from ChimeraSlayer.

<sup>3</sup>Chimeric reads excluded based on output from UCHIME.
