# Supplementary material for: Assessing the Consequences of Denoising Marker-Based Metagenomic Data
Source: PubMed Central journal article supplement (PMC3607570; doi:10.1371/journal.pone.0060458), 2013-03-25
Supplement: pone.0060458.s003.pdf [file pone.0060458.s003.pdf]

```

A cluster AGACTCGACGTCCTACGGGAGGCAGCAGTGAGGAATATTGGTCAATGGGTGCAAGCCTGA
GZIPSVE01DKJ6F AGACTCGACGTCCTACGGGAGGCAGCAGTGAGGAATATTGGTCAATGGGTGCAAGCCTGA
GZIPSVE02G2SK0 AGACTCGACGTCCTACGGGAGGCAGCAGTGAGGAATATTGGTCAATGGGTGCAAGCCTGA
GZIPSVE02F8LPD AGACTCGACGTCCTACGGGAGGCAGCAGTGAGGAATATTGGTCAATGGGTGCAAGCCTGA
*****

cluster ACCAGCCATCCC CGGTGAAGGACGACTGCCCTATGGGTTGTAAACTTCTTTTGTATAGGG
GZIPSVE01DKJ6F ACCAGCCATCCC CGGTGAAGGACGACTGCCCTATGGGTTGTAAACTTCTTTTGTATAGGG
GZIPSVE02G2SK0 ACCAGCCATCCC CGGTGAAGGACGACTGCCCTATGGGTTGTAAACTTCTTTTGTATAGGG
GZIPSVE02F8LPD ACCAGCCATCCC CGGTGAAGGACGACTGCCCTATGGGTTGTAAACTTCTTTTGTATAGGG
*****

cluster ATAAACCTACCCTCGTGAGGGTAGCTGAAGGTACTATACGAATAAGCACCCGGCTAACTCC
GZIPSVE01DKJ6F ATAAACCTACCCTCGTGAGGGTAGCTGAAGGTACTATACGAATAAGCACCCGGCTAACTCC
GZIPSVE02G2SK0 ATAAACCTACCCTCGTGAGGGTAGCTGAAGGTACTATACGAATAAGCACCCGGCTAACTCC
GZIPSVE02F8LPD ATAAACCTACCCTCGTGAGGGTAGCTGAAGGTACTATACGAATAAGCACCCGGCTAACTCC
*****

cluster GTGCCAGCAGCCCGGTAATACGGAGGGTGCAAGCGTTATCCGGATTTTATTGGGTTTAA
GZIPSVE01DKJ6F GTGCCAGCAGCCCGGTAATACGGAGGGTGCAAGCGTTATCCGGATTTTATTGGGTTTAA
GZIPSVE02G2SK0 GTGCCAGCAGCCCGGTAATACGGAGGGTGCAAGCGTTATCCGGATTT-ATTGGGTTTAA
GZIPSVE02F8LPD GTGCCAGCAGCCCGGTAATACGGAGGGTGCAAGCGTTATCCGGATTT-ATTGGGTTTAA
*****

cluster AGGGTCCGTAGGCGGACTTATAAGTCAGTGGTGAAAGCCTGTCGCTTAACGATAGAAGTGT
GZIPSVE01DKJ6F AGGGTCCGTAGGCGGACTTATAAGTCAGTGGTGAAAGCCTGTCGCTTAACGATAGAAGTGT
GZIPSVE02G2SK0 AGGGTCCGTAGGCGGACTTATAAGTCAGTGGTGAAAGCCTGTCGCTTAACGATAGAAGTGT
GZIPSVE02F8LPD AGGGTCCGTAGGCGGACTTATAAGTCAGTGGTGAAAGCCTGTCGCTTAACGATAGAAGTGT
*****

cluster CCATTGATACTGTAAGTCTTGAGTATATTTGAGGTAGCTGGAATAAGTAGTGTAGCGGTG
GZIPSVE01DKJ6F CCATTGATACTGTAAGTCTTGAGTATATTTGAGGTAGCTGGAATAAGTAGTGTAGCGGTG
GZIPSVE02G2SK0 CCATTGATACTGTAAGTCTTGAGTATATTTGAGGTAGCTGGAATAAGTAGTGTAGCGGTG
GZIPSVE02F8LPD CCATTGATACTGTAAGTCTTGAGTATATTTGAGGTAGCTGGAATAAGTAGTGTAGCGGTG
*****

cluster AAATGCATAGATATTACTTAGAACACCAATTGCGAAGGCAGGTTACCAAGATATAACTGA
GZIPSVE01DKJ6F AAATGCATAGATATTACTTAGAACACCAATTGCGAAGGCAGGTTACCAAGATATAACTGA
GZIPSVE02G2SK0 AAATGCA-----
GZIPSVE02F8LPD AAATGCATAGATATTACTTAGAACACCAATTGCGAAGGCAGGTTACCAAGATATAACTGA
*****

cluster CGCTGAGGGACGAAAGCG
GZIPSVE01DKJ6F CGCTGAGGGACGAAAGCG
GZIPSVE02G2SK0 -----
GZIPSVE02F8LPD CGCTGAGGGACGAAAG--

```

**B**

|        | G  | T    | A    | C    | G    | T    | A    | C    | G    | T    |      |
|--------|----|------|------|------|------|------|------|------|------|------|------|
| >DKJ6F |    | 2.08 | 0.19 | 0.94 | 0.00 | 0.07 | 3.60 | 1.25 | 0.14 | 0.26 | 1.78 |
|        | GG |      | A    |      |      | TTTT | A    |      |      | TT   |      |
| >G2SK0 |    | 2.30 | 0.16 | 1.26 | 0.06 | 0.15 | 3.28 | 0.91 | 0.08 | 0.31 | 1.84 |
|        | GG |      | A    |      |      | TTT  | A    |      |      | TT   |      |
| >F8LPD |    | 2.04 | 0.16 | 0.89 | 0.06 | 0.08 | 3.29 | 1.01 | 0.18 | 0.21 | 1.87 |
|        | GG |      | A    |      |      | TTT  | A    |      |      | TT   |      |
