# Supplementary material for: Assessing the Consequences of Denoising Marker-Based Metagenomic Data
Source: PubMed Central journal article supplement (PMC3607570; doi:10.1371/journal.pone.0060458), 2013-03-25

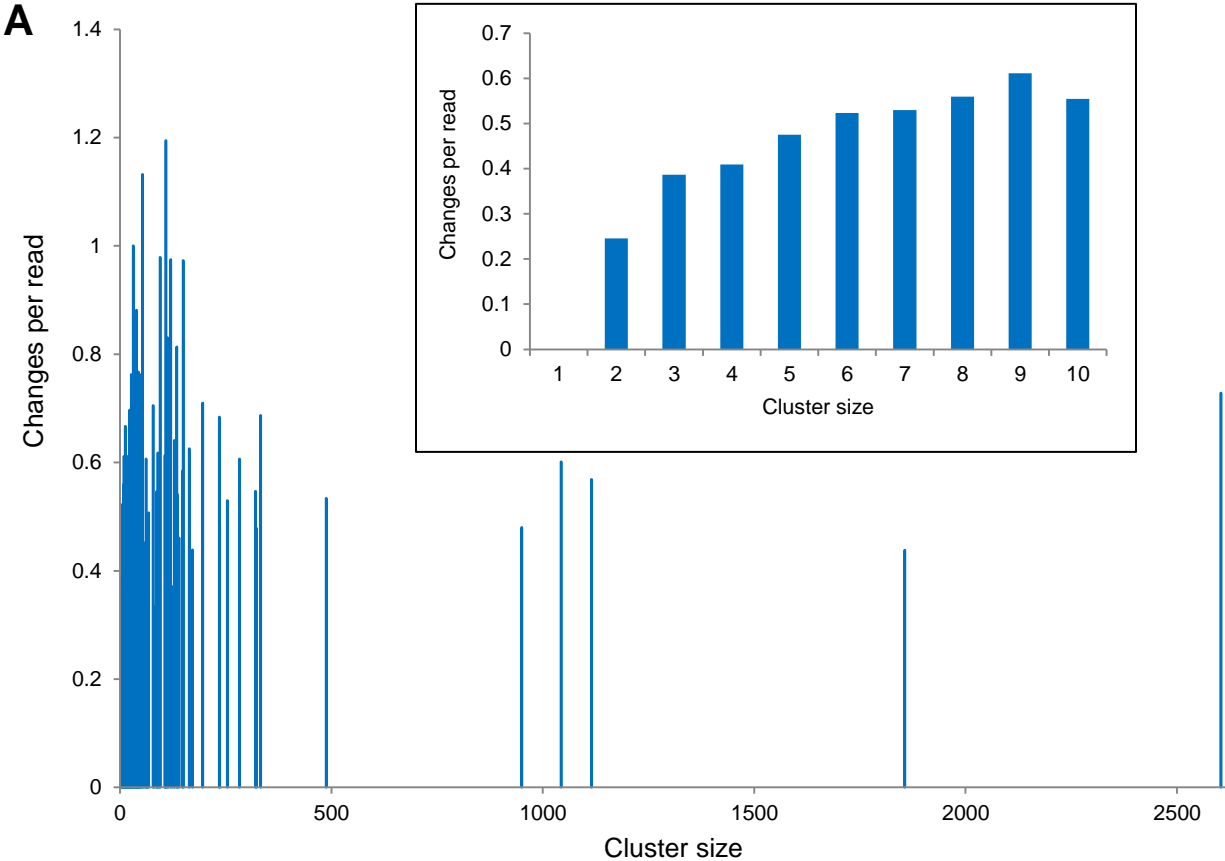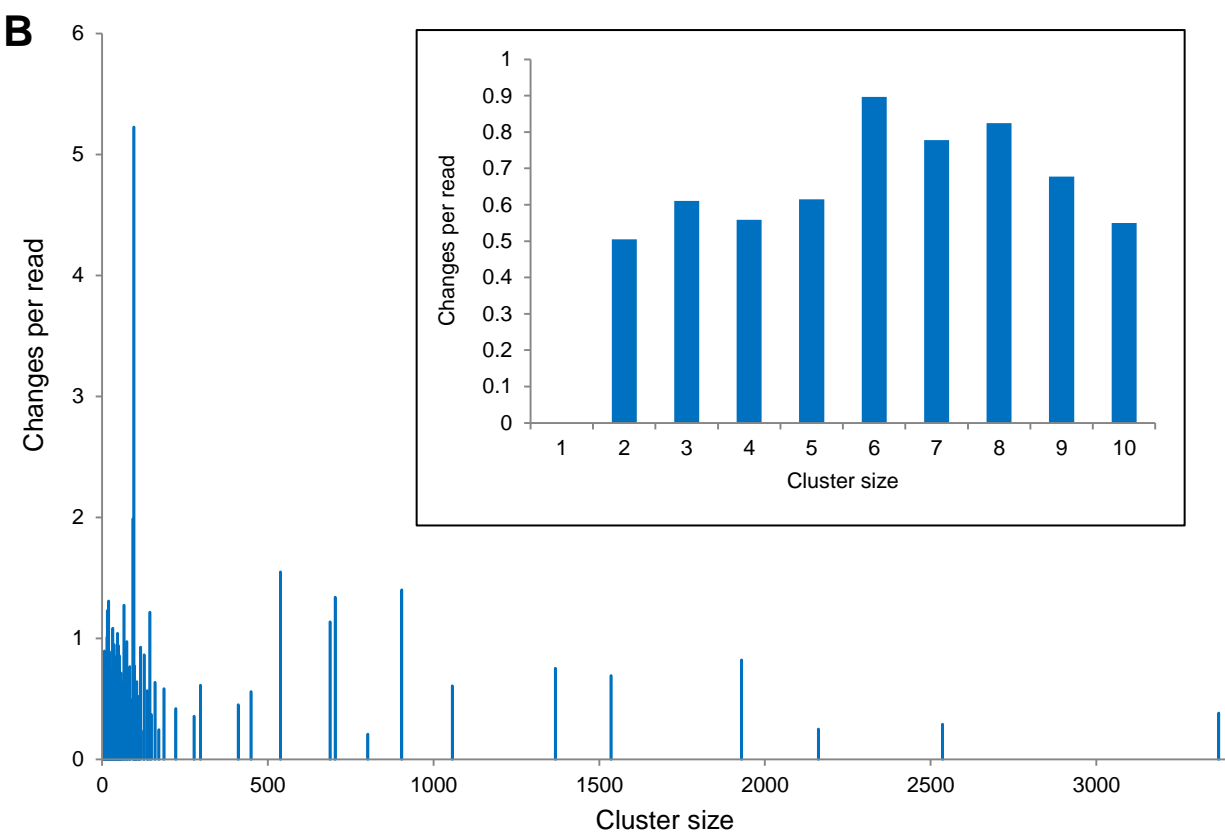

Supplement: pone.0060458.s004.pdf [file pone.0060458.s004.pdf]
