# Supplementary material for: Assessing the Consequences of Denoising Marker-Based Metagenomic Data
Source: PubMed Central journal article supplement (PMC3607570; doi:10.1371/journal.pone.0060458), 2013-03-25
Supplement: pone.0060458.s005.pdf [file pone.0060458.s005.pdf]

| Flow:    | C    | G    | T     | A    | C    | G    |
|----------|------|------|-------|------|------|------|
| >FY1WZ   | 1.03 | 1.94 | 4.80  | 0.17 | 0.01 | 0.70 |
|          | C    | GG   | TTTTT |      |      | G    |
| >J3MF7   | 1.16 | 1.95 | 4.34  | 0.21 | 0.09 | 0.85 |
|          | C    | GG   | TTTT  |      |      | G    |
| >IYP1C   | 0.95 | 1.86 | 4.10  | 0.19 | 0.10 | 0.88 |
|          | C    | GG   | TTTT  |      |      | G    |
| >cluster | C    | GG   | TTTT  |      |      | G    |
