# Supplementary material for: Assessing the Consequences of Denoising Marker-Based Metagenomic Data
Source: PubMed Central journal article supplement (PMC3607570; doi:10.1371/journal.pone.0060458), 2013-03-25

**A**

| Flow:    | C    | G    | T          | A          | C         | G         |
|----------|------|------|------------|------------|-----------|-----------|
| >A81VH   | 0.12 | 0.14 | 1.94<br>TT | 0.95<br>A  | 1.21<br>C | 1.00<br>G |
| >BDVHW   | 0.19 | 0.12 | 1.10<br>T  | 2.07<br>AA | 1.03<br>C | 0.95<br>G |
| >DGID9   | 0.14 | 0.14 | 1.04<br>T  | 2.05<br>AA | 1.18<br>C | 0.97<br>G |
| >cluster |      |      | T          | AA         | C         | G         |

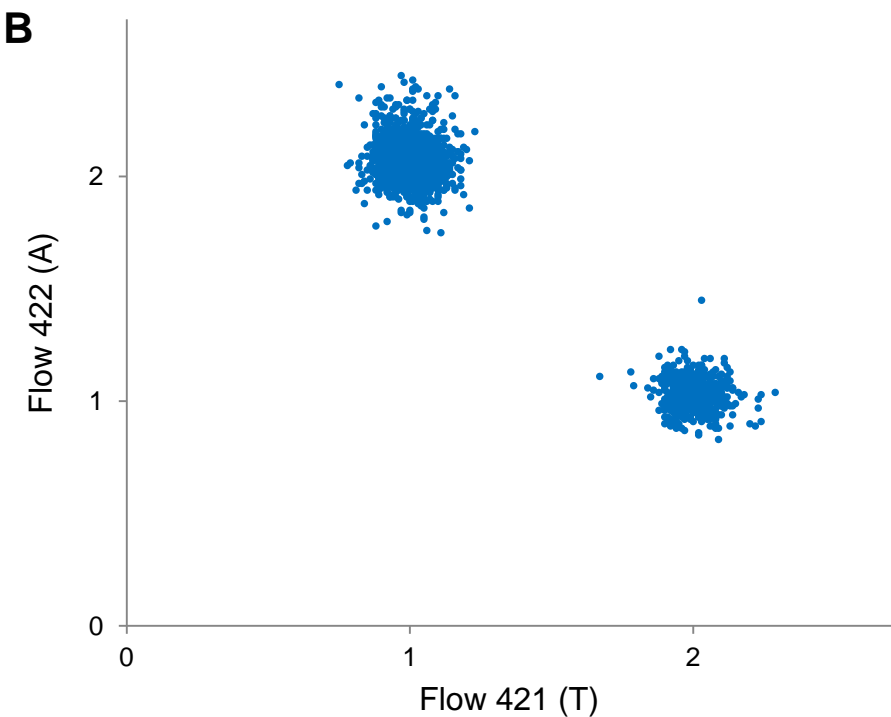

Supplement: pone.0060458.s006.pdf [file pone.0060458.s006.pdf]
