# Supplementary material for: Assessing the Consequences of Denoising Marker-Based Metagenomic Data
Source: PubMed Central journal article supplement (PMC3607570; doi:10.1371/journal.pone.0060458), 2013-03-25
Supplement: pone.0060458.s007.pdf [file pone.0060458.s007.pdf]

cluster AGCACTGTAGCCGTCAATTCATTTGAGTTTTAATCTTGCACCGTACTCCCCAGGCGGTC  
GZIPSVE02HJ69D AGCACTGTAGCCGTCAATTCATTTGAGTTTTAATCTTGCACCGTACTCCCCAGGCGGTC  
GZIPSVE01C6P61 AGCACTGTAGCCGTCAATTCATTTGAGTTTTAATCTTGCACCGTACTCCCCAGGCGGTC  
GZIPSVE01CRUN5 AGCACTGTAGCCGTCAATTCATTTGAGTTTTAATCTTGCACCGTACTCCCCAGGCGGTC  
\*\*\*\*\*

cluster AACTTAATGCGTTAGCTGCGACACAGAGGGGATCAACACCCCCTGCACCTAGTTGACATC  
GZIPSVE02HJ69D AACTTAATGCGTTAGCTGCGACACAGAGGGGATCAACACCCCCTGCACCTAGTTGACATC  
GZIPSVE01C6P61 AACTTAATGCGTTAGCTGCGACACAGAGGGGATCAACACCCCCTGCACCTAGTTGACATC  
GZIPSVE01CRUN5 AACTTAATGCGTTAGCTGCGACACAGAGGGGATCAACACCCCCTGCACCTAGTTGACATC  
\*\*\*\*\*

cluster GTTTACGGCGTGGACTACCAGGGTATCTAATCCTGTTTGTCTCCCCACGCTTTCGCGCCTC  
GZIPSVE02HJ69D GTTTACGGCGTGGACTACCAGGGTATCTAATCCTGTTTGTCTCCCCACGCTTTCGCGCCTC  
GZIPSVE01C6P61 GTTTACGGCGTGGACTACCAGGGTATCTAATCCTGTTTGTCTCCCCACGCTTTCGCGCCTC  
GZIPSVE01CRUN5 GTTTACGGCGTGGACTACCAGGGTATCTAATCCTGTTTGTCTCCCCACGCTTTCGCGCCTC  
\*\*\*\*\*

cluster AGCGTCAGTATTACAGCCAGAAAGTCGCCTTCGCCACCGGTATCCCTCCCGATATCTACGA  
GZIPSVE02HJ69D AGCGTCAGTATTACAGCCAGAAAGTCGCCTTCGCCACCGGTATCCCTCCCGATATCTACGA  
GZIPSVE01C6P61 AGCGTCAGTATTACAGCCAGAAAGTCGCCTTCGCCACCGGTATCCCTCCCGATATCTACGA  
GZIPSVE01CRUN5 AGCGTCAGTATTACAGCCAGAAAGTCGCCTTCGCCACCGGTATCCCTCCCGATATCTACGA  
\*\*\*\*\*

cluster ATTTACCTCTACACCGGAATTCCACTTTCCCCTCTGATACTCAAGCCGGGCAGTTTCA  
GZIPSVE02HJ69D ATTTACCTCTACACCGGAATTCCACTTTCCCCTCTGATACTCAAGCCGGGCAGTTTCA  
GZIPSVE01C6P61 ATTTACCTCTACACCGGAATTCCACTTTCCCCTCTGATACTCAAGCCGGGCAGTTTCA  
GZIPSVE01CRUN5 ATTTACCTCTACACCGGAATTCCACTTTCCCCTCTGATACTCAAGCCGGGCAGTTTCA  
\*\*\*\*\*

cluster AATGCACCTCCACGGTTAAGCCGTGGGCTTTACATCTGACTTGCCAGGCCGCCTGCGCG  
GZIPSVE02HJ69D AATGCACCTCCACGGTTAAGCCGTGGGCTTTACATCTGACTTGCCAGGCCGCCTGCGCG  
GZIPSVE01C6P61 AATGCACCTCCACGGTTAAGCCGTGGGCTTTACATCTGACTTGCCAGGCCGCCTGCGCG  
GZIPSVE01CRUN5 AATGCACCTCCACGGTTAAGCCGTGGGCTTTACATCTGACTTGCCAGGCCGCCTGCGCG  
\*\*\*\*\*

cluster CCCTTTACGCCAGTGATTCGGAAC-----  
GZIPSVE02HJ69D CCCTTTACGCCAGTGATTCGGAAC-----  
GZIPSVE01C6P61 CCCTTTACGCCAGTGATTCGGAACAACCGCTTGCACCCTCCGTATTACCGCGGCTGCTG  
GZIPSVE01CRUN5 CCCTTTACGCCAGTGATTCGGAACAAC-GCTTGCACCCTCCGTATTACCGCGGCTGCTG  
\*\*\*\*\*

cluster -----  
GZIPSVE02HJ69D -----  
GZIPSVE01C6P61 GCACGGAGTT-  
GZIPSVE01CRUN5 GCACAGAGTTA
