# Supplementary material for: Assessing the Consequences of Denoising Marker-Based Metagenomic Data
Source: PubMed Central journal article supplement (PMC3607570; doi:10.1371/journal.pone.0060458), 2013-03-25
Supplement: pone.0060458.s008.pdf [file pone.0060458.s008.pdf]

cluster AGTCGTACACTCCTACGGGAGGCAGCAGTGGGGAATATGGACAATGGGCGAAAGCCTGA  
GZIPSVE02G0323 AGTCGTACACTCCTACGGGAGGCAGCAGTGGGGAATATGGACAATGGGCGAAAGCCTGA  
GZIPSVE02HSRLA AGTCGTACACTCCTACGGGAGGCAGCAGTGGGGAATATGGACAATGGGCGAAAGCCTGA  
GZIPSVE02IH7MV AGTCGTACACTCCTACGGGAGGCAGCAGTGGGGAATATGGACAATGGGCGAAAGCCTGA  
\*\*\*\*\*

cluster TCCAGCAATACCGCGTGAATGATGAAGGCCCTAGGGTTGTAAAGTTCCTTTAATAGGGAA  
GZIPSVE02G0323 TCCAGCAATACCGCGTGAATGATGAAGGCCCTAGGGTTGTAAAGTTCCTTTAATAGGGAA  
GZIPSVE02HSRLA TCCAGCAATACCGCGTGAATGATGAAGGCCCTAGGGTTGTAAAGTTCCTTTAATAGGGAA  
GZIPSVE02IH7MV TCCAGCAATACCGCGTGAATGATGAAGGCCCTAGGGTTGTAAAGTTCCTTTAATAGGGAA  
\*\*\*\*\*

cluster GATAATGACGGTACCTATAGAAAAAGCCCGGCTAACTCCGTGCCAGCAGCCGCGGTAAG  
GZIPSVE02G0323 GATAATGACGGTACCTATAGAAAAAGCCCGGCTAACTCCGTGCCAGCAGCCGCGGTAAG  
GZIPSVE02HSRLA GATAATGACGGTACCTATAGAAAAAGCCCGGCTAACTCCGTGCCAGCAGCCGCGGTAAG  
GZIPSVE02IH7MV GATAATGACGGTACCTATAGAAAAAGCCCGGCTAACTCCGTGCCAGCAGCCGCGGTAAG  
\*\*\*\*\*

cluster ACGGAGGGGGCTAGCGTTATTTCGGAATTACTGGGCGTAAAGGGCGCGTAGGCGGATTAGT  
GZIPSVE02G0323 ACGGAGGGGGCTAGCGTTATTTCGGAATTACTGGGCGTAAAGGGCGCGTAGGCGGATTAGT  
GZIPSVE02HSRLA ACGGAGGGGGCTAGCGTTATTTCGGAATTACTGGGCGTAAAGGGCGCGTAGGCGGATTAGT  
GZIPSVE02IH7MV ACGGAGGGGGCTAGCGTTATTTCGGAATTACTGGGCGTAAAGGGCGCGTAGGCGGATTAGT  
\*\*\*\*\*

cluster AAGTTGGGAGTGAAAGCCCGGGGCTTAACCTCGGAACGCTTTCAAAGTCTAGTCTTG  
GZIPSVE02G0323 AAGTTGGGAGTGAAAGCCCGGGGCTTAACCTCGGAACGCTTTCAAAGTCTAGTCTTG  
GZIPSVE02HSRLA AAGTTGGGAGTGAAAGCCCGGGGCTTAACCTCGGAACGCTTTCAAAGTCTAGTCTTG  
GZIPSVE02IH7MV AAGTTGGGAGTGAAAGCCCGAGGCTTAACCTCGGAACGCTTTCAAAGTCTAGTCTTG  
\*\*\*\*\*

cluster AGTGAAGTAGGGGGTATGGAATTCCTAGTGTAGAGGTGAAATTCCTAGATATTAGGAGG  
GZIPSVE02G0323 AGTGAAGTAGGGGGTATGGAATTCCTAGTGTAGAGGTGAAATTCCTAGATATTAGGAGG  
GZIPSVE02HSRLA AGTGAAGTAGGGGGTATGGAATTCCTAGTGTAGAGGTGAAATTCCTAGATATTAGGAGG  
GZIPSVE02IH7MV AGTGAAGTAGGGGGTATGGAATTCCTAGTGTAGAGGTGAAATTCCTAGATATTAGGAGG  
\*\*\*\*\*

cluster AACACCGGTGGTGAAGGCGGTCACCTGGACTTCAACTGACGCTGAGGCGCGAAAGCGTGG  
GZIPSVE02G0323 AACACCGGTGGTGAAGGCGGTCACCTGGACTTCAACTGACGCTGAGGCGCGAAAGCGTGG  
GZIPSVE02HSRLA AACACCGGTGGCGAAGGCGGTCACCTGGACTTCAACTGACGCTGAGGCGCGAAAGCGTGG  
GZIPSVE02IH7MV AACACCGGTGGCGAAGGCGGTCACCTGGACTTCAACTGACGCTGAGGCGCGAAAGCGTGG  
\*\*\*\*\*

cluster GGAGCAAA  
GZIPSVE02G0323 GGAGCAAA  
GZIPSVE02HSRLA GGAGCAAA  
GZIPSVE02IH7MV GGAGCAAA  
\*\*\*\*\*
