# Supplementary material for: Assessing the Consequences of Denoising Marker-Based Metagenomic Data
Source: PubMed Central journal article supplement (PMC3607570; doi:10.1371/journal.pone.0060458), 2013-03-25
Supplement: pone.0060458.s009.pdf [file pone.0060458.s009.pdf]

### A. CleanOpt

|                            | Too few flows (< 360) | No signal for three flows | Large flow value (> 6.49) | Flow value between 0.50 and 0.70 | Too many flows (> 720) | Total number |
|----------------------------|-----------------------|---------------------------|---------------------------|----------------------------------|------------------------|--------------|
| <u>With truncations</u>    |                       |                           |                           |                                  |                        |              |
| Reads eliminated           | 3,101                 | 113                       | 184                       | 5,505                            | N/A                    | 8,903        |
| Reads truncated            | N/A                   | 677                       | 40                        | 17,184                           | 7,080                  | 24,981       |
| <u>Without truncations</u> |                       |                           |                           |                                  |                        |              |
| Reads eliminated           | 3,101                 | 0                         | 0                         | 0                                | N/A                    | 3,101        |
| Reads truncated            | N/A                   | 0                         | 0                         | 0                                | 0                      | 0            |

40,596 flowgrams were retrieved by SplitKeys and analyzed by CleanOpt.pl.

### B. split\_libraries (QIIME)

|                  | Minimum length (150 bp) | Maximum length (550 bp) | Sliding window of quality scores | Total number |
|------------------|-------------------------|-------------------------|----------------------------------|--------------|
| Reads eliminated | 1,277                   | 182                     | 2,220                            | 3,679        |
| Reads truncated  | N/A                     | N/A                     | 20,493                           | 20,493       |

split\_libraries.py was applied to our reads using the recommended (-l 150, -L 550, -w 50) and other default parameters.

### C. trim.flows (mothur)

|                  | Too few flows (< 449) | No signal for four flows | Flow value between 0.50 and 0.70 | Too many flows (> 450) | Total number |
|------------------|-----------------------|--------------------------|----------------------------------|------------------------|--------------|
| Reads eliminated | 4,794                 | 193                      | 10,490                           | N/A                    | 15,477       |
| Reads truncated  | N/A                   | 0                        | 0                                | 25,119                 | 25,119       |

40,596 flowgrams were retrieved and analyzed by trim.flows using the default settings.
