# Supplementary material for: Assessing the Consequences of Denoising Marker-Based Metagenomic Data
Source: PubMed Central journal article supplement (PMC3607570; doi:10.1371/journal.pone.0060458), 2013-03-25
Supplement: pone.0060458.s012.pdf [file pone.0060458.s012.pdf]

GZIPSVE02FSVFT TAACCTTGC GGCCGTACTCCCCAGGCGGTCAACTTAATGCGTTAGCTGC-----  
GZIPSVE01DR8QC TAACCTTGC GGCCGTACTCCCCAGGCGGTCAACTTAATGCGTTAGCTGCGCCACTAAGAG  
\*\*\*\*\*

GZIPSVE02FSVFT -----  
GZIPSVE01DR8QC CTCAAGGCTCCCAACGGCTAGTTGACATCGTTTTACGGCGTGGACTACCAGGGTATCTAAT

GZIPSVE02FSVFT -----  
GZIPSVE01DR8QC CCTGTTTGCTCCCCACGCTTTTCGCACCTCAGTGTCAGTATCAGTCCAGGTGGTTCGCCCTTC

GZIPSVE02FSVFT -----  
GZIPSVE01DR8QC GCCACTGGTGTTCTTCTTATATCTACGCATCTCACCGCTACACAGGAAATTCCACCACC

GZIPSVE02FSVFT -----GTTTTGAATGCAGTTCCAGGTTGAGCCCGGGGATTT  
GZIPSVE01DR8QC CTCTACCATACTCTAGTCAGTCAGTTTTGAATGCAGTTCCAGGTTGAGCCCGGGGATTT  
\*\*\*\*\*

GZIPSVE02FSVFT CACATCCA ACTTAACTAACCACCTACGCGCGCTTTACGCCAGTAATCCGATTAACGCT  
GZIPSVE01DR8QC CACATCCA ACTTAACTAACCACCTACGCGCGCTTTACGCCAGTAATCCGATTAACGCT  
\*\*\*\*\*

GZIPSVE02FSVFT TGCACCCCTGTATTACCGCGGCTGCTGGCACAGAGTTAGCCGGTGC TTATTCTGTTCGGT  
GZIPSVE01DR8QC TGCACCCCTGTATTACCGCGGCTGCTGGCACAGAGTTAGCCGGTGC TTATTCTGTTCGGT  
\*\*\*\*\*

GZIPSVE02FSVFT AACGTCAAAACAGCAAAGTATTAATTTACTGCCCTTCTCCCAACTTAAAGTGCTTTACA  
GZIPSVE01DR8QC AACGTC-----  
\*\*\*\*\*

GZIPSVE02FSVFT ATCCGAAGACCTTCTTACACACGCGGCATGGCTGGATCAGGCTTTCGCCACTGTCCAAT  
GZIPSVE01DR8QC -----

GZIPSVE02FSVFT ATTCCCA  
GZIPSVE01DR8QC -----
