# Supplementary material for: Assessing the Consequences of Denoising Marker-Based Metagenomic Data
Source: PubMed Central journal article supplement (PMC3607570; doi:10.1371/journal.pone.0060458), 2013-03-25
Supplement: pone.0060458.s013.pdf [file pone.0060458.s013.pdf]

# A

MID15\_407 → MID15\_2420 → MID15\_6180 → MID15\_924 → MID15\_3210 → MID15\_6325 → MID15\_6323

# B

|                         |                                                                                                                                                |
|-------------------------|------------------------------------------------------------------------------------------------------------------------------------------------|
| MID15_6323<br>MID15_407 | TGGGGAATTTTTCCGCAATGGGCGAAAAGCCTGACGGAGCAACGCCGCGTGAGGGATGAA<br>TGGGGAATTTT-CCGCAATGGGCGAAA-GCCTGACGGAGCAACGCCGCGTGAGGGATGAA<br>*****          |
| MID15_6323<br>MID15_407 | GGCCTCTGGGCTGTAAACCTCTTTTATCAAGGAAGAAGATCTGACGGTACTTGATGAAT<br>GGCCTCTGGGCTGTAAACCTCTTTT-ATCAAGGAAGAAGATCTGACGGTACTTGATGAAT<br>*****           |
| MID15_6323<br>MID15_407 | AAGCCACGGCTAATTCGGTGCCAGCAGCCGCGGTAATACGGGAGTGGCAAGCGTTATCCG<br>AAGCCACGGCTAATTCGGTGCCAGCAGCCGCGGTAATACGGGAGTGGCAAGCGTTATCCG<br>*****          |
| MID15_6323<br>MID15_407 | GAATTATTGGGCGTAAAGCGTCCGAGGCGGTCT-GTCAAGTCTGCTGTTAAAGCGTG-A<br>GAATTATTGGGCGTAAAGCGTCCGAGGCGGTCTTGT-AAGTCTGTTGTTAAAGCGTGGA<br>***** ** ***** * |
| MID15_6323<br>MID15_407 | GCTTAACTCCATTTCCGGCAGTGGAACTG-ACAGACTAGAGTGTGGTA-----<br>GCTTAACTCCATTTACGCAATGGAACTGTA-AGACTAGAGTGTGGTAGGGCAGAGGGA<br>***** ** ***** *        |
| MID15_6323<br>MID15_407 | -----<br>ATTCCCGGTGTAGCGGTGAAATGCGTAGATATCGGGAAGAACCAGTGGCGAAGGCGCT                                                                            |
| MID15_6323<br>MID15_407 | -----<br>CTGCTGGGCCATAACTGACGCTCATGGACGAAAGCC                                                                                                  |
