# Supplementary material for: Assessing the Consequences of Denoising Marker-Based Metagenomic Data
Source: PubMed Central journal article supplement (PMC3607570; doi:10.1371/journal.pone.0060458), 2013-03-25
Supplement: pone.0060458.s014.pdf [file pone.0060458.s014.pdf]

**A**

|            |                                                              |
|------------|--------------------------------------------------------------|
| MID12_200  | TGGGGAATATTGGACAATGGGCGAAAGCCTGATCCAGCCATGCCCGTGTGTGAAGAAGG  |
| MID12_2955 | TGGGGAATATTGGACAATGGGCGAAAGCCTGATCCAGCCATGCCCGTGTGTGAAGAAGG  |
|            | *****                                                        |
| MID12_200  | TCTTCGGATTGTAAAGCACTTTAAGTTGGGAGGAAGGGCAGTAAATTAATACTTTGCTGT |
| MID12_2955 | TCTTCGGATTGTAAAGCACTTTAAGTTGGGAGGAAGGGCAGTAAATTAATACTTTGCTGT |
|            | *****                                                        |
| MID12_200  | TTTGACGTTACCGACAGAATAAGCACC GGCTAACTCTGTGCCAGCAGCCGCGTAATACA |
| MID12_2955 | TTTGACGTTACCGACAGAATAAGCACC GGCTAACTCTGTGCCAGCAGCCGCGTAATACA |
|            | *****                                                        |
| MID12_200  | GAGGGTGCAAGCGTTAATCGGAATTACTGGGCGTAAAGCGCGTAGGTGGTTAGTTAAG   |
| MID12_2955 | GAGGGT-----                                                  |
|            | *****                                                        |
| MID12_200  | TTGGATGTGAAATCCCCGGGCTCAACCTGGGAAGTGCATTCAAACTGACTGACTAGAGT  |
| MID12_2955 | -----                                                        |
|            | *****                                                        |
| MID12_200  | ATGGTAGAGGGTGGTGGAAATTCCTGTGTAGCGGTGAAATGCGTAGATATAGGAAGAAC  |
| MID12_2955 | -----                                                        |
|            | *****                                                        |
| MID12_200  | ACCAGTGGCGAAGGCGACCACCTGGACTGATACTGACTGAGGTG                 |
| MID12_2955 | -----                                                        |

**B**

|            |                                                              |
|------------|--------------------------------------------------------------|
| MID12_2955 | TGGGGAATATTGGACAATGGGCGAAAGCCTGATCCAGCCATGCCCGTGTGTGAAGAAGG  |
| MID12_4567 | TGGGGAATATTGGACAATGGGCGAAAGCCTGATCCAGCCATGCCCGTGTGTGAAGAAGG  |
|            | *****                                                        |
| MID12_2955 | TCTTCGGATTGTAAAGCACTTTAAGTTGGGAGGAAGGGCAGTAAATTAATACTTTGCTGT |
| MID12_4567 | TCTTCGGATTGTAAAGCACTTTAAGTTGGGAGGAAGGGCAGTAAATTAATACTTTGCTGT |
|            | *****                                                        |
| MID12_2955 | TTTGACGTTACCGACAGAATAAGCACC GGCTAACTCTGTGCCAGCAGCCGCGTAATACA |
| MID12_4567 | TTTGACGTTACCGACAGAATAAGCACC GGCTAACTCTGTGCCAGCAGCCGCGTAATACA |
|            | *****                                                        |
| MID12_2955 | GAGGGT-----                                                  |
| MID12_4567 | GAGGGTGCAAGCGTTACTCGGAATTACTGGGCGTAAAGCGTGCAGTAGGTGGTCTTTAAG |
|            | *****                                                        |
| MID12_2955 | -----                                                        |
| MID12_4567 | TCTGTTGTGAAAGCCCTGGGCTCAACCTGGGAAGTGCAGTGGAACTGGACGACTAGAGT  |
|            | *****                                                        |
| MID12_2955 | -----                                                        |
| MID12_4567 | GTGGTAGAGGGTAGCGGAATTCCTGTGTAGCAGTGAATGCGTAGAGATCAGGAGGAAC   |
|            | *****                                                        |
| MID12_2955 | -----                                                        |
| MID12_4567 | ATCCATGGCGAAGGCAGTACCTGGACCAACTGACTGAGGCACGAAAGCGT           |

**C**

|            |                                                              |
|------------|--------------------------------------------------------------|
| MID12_200  | TGGGGAATATTGGACAATGGGCGAAAGCCTGATCCAGCCATGCCCGTGTGTGAAGAAGG  |
| MID12_4567 | TGGGGAATATTGGACAATGGGCGAAAGCCTGATCCAGCCATGCCCGTGTGTGAAGAAGG  |
|            | *****                                                        |
| MID12_200  | TCTTCGGATTGTAAAGCACTTTAAGTTGGGAGGAAGGGCAGTAAATTAATACTTTGCTGT |
| MID12_4567 | TCTTCGGATTGTAAAGCACTTTAAGTTGGGAGGAAGGGCAGTAAATTAATACTTTGCTGT |
|            | *****                                                        |
| MID12_200  | TTTGACGTTACCGACAGAATAAGCACC GGCTAACTCTGTGCCAGCAGCCGCGTAATACA |
| MID12_4567 | TTTGACGTTACCGACAGAATAAGCACC GGCTAACTCTGTGCCAGCAGCCGCGTAATACA |
|            | *****                                                        |
| MID12_200  | GAGGGTGCAAGCGTTAATCGGAATTACTGGGCGTAAAGCGCGTAGGTGGTTAGTTAAG   |
| MID12_4567 | GAGGGTGCAAGCGTTACTCGGAATTACTGGGCGTAAAGCGTGCAGTAGGTGGTCTTTAAG |
|            | *****                                                        |
| MID12_200  | TTGGATGTGAAATCCCCGGGCTCAACCTGGGAAGTGCATTCAAACTG-ACTGACTAGAG  |
| MID12_4567 | TCTGTTGTGAAAGCCCTGGGCTCAACCTGGGAAGTGCAGTGGAACTGGAC-GACTAGAG  |
|            | * * ***** * * ***** * ***** * ***** * * *****                |
| MID12_200  | TATGGTAGAGGGTGGTGGAAATTCCTG-TGTAGCGGTGAAATGCGTAGATAT-AGGAAGG |
| MID12_4567 | TGTGGTAGAGGGTAGCGGAATT-CCTGGTGTAGCAGTGAATGCGTAGAGATCAGGA-GG  |
|            | * ***** * ***** * ***** * ***** * ***** * * * * *            |
| MID12_200  | AACA-CCAGTGGCGAAGGCGACCACCTGGACTGATACTGACTGAGGTG-----        |
| MID12_4567 | AACATCCA-TGGCGAAGGCAGCTACCTGGACCAACTGACTGAGGCACGAAAGCGT      |
|            | **** * * ***** * ***** * *****                               |
