# Supplementary material for: Assessing the Consequences of Denoising Marker-Based Metagenomic Data
Source: PubMed Central journal article supplement (PMC3607570; doi:10.1371/journal.pone.0060458), 2013-03-25
Supplement: pone.0060458.s015.pdf [file pone.0060458.s015.pdf]

cluster ATATCGCGAGCCTACGGGAGGCAGCAGTGGGGAATATTGGACAATGGGCGAAAGCC-GAT  
GZIPSVE02FH6HB ATATCGCGAGCCTACGGGAGGCAGCAGTGGGGAATATTGGACAATGGGCGAAAGCCCAT  
GZIPSVE02IEKVK ATATCGCGAGCCTACGGGAGGCAGCAGTGGGGAATATTGGACAATGGGCGAAAGCCTGAT  
\*\*\*\*\*

cluster CCAGCCATGCCGCGTGTGTGAAGAAGGTCTTCGGATTGTAAAGCACTTTAAGTTGGGAGG  
GZIPSVE02FH6HB CCAGCCATGCCGCGTGTGTGAAGAAGGTCTTCGGATTGTAAAGCACTTTAAGTTGGGAGG  
GZIPSVE02IEKVK CCAGCCATGCCGCGTGTGTGAAGAAGGTCTTCGGATTGTAAAGCACTTTAAGTTGGGAGG  
\*\*\*\*\*

cluster AAGGGCAGTAAATTAATACTTTGCTGTTTTGACGTTACCGACAGAATAAGCACCGGCTAA  
GZIPSVE02FH6HB AAGGGCAGTAAATTAATACTTTGCTGTTTTGACGTTACCGACAGAATAAGCACCGGCTAA  
GZIPSVE02IEKVK AAGGGCAGTAAATTAATACTTTGCTGTTTTGACGTTACCGACAGAATAAGCACCGGCTAA  
\*\*\*\*\*

cluster CTCTGTGCCAGCAGCCGCGGTAATACAGAGGGTGCAAGCGTTAATCGGAATTACTGGGCG  
GZIPSVE02FH6HB CTCTGTGCCAGCAGCCGCGGTAATACAGAGGGTGCAAGCGTTAATCGGAATTACTGGGCG  
GZIPSVE02IEKVK CTCTGTGCCAGCAGCCGCGGTAATACAGAGGGTGCAAGCGTTAATCGGAATTACTGGGCG  
\*\*\*\*\*

cluster TAAAGCGCGCGTAGGTGGTTAGTTAAGTTGGATGTGAA-TCCCGGGCTCAACCTGGGAA  
GZIPSVE02FH6HB TAAAGCGCGCGTAGGTGGTTAGTTAAGTTGGATGTGAAATCCCGGGCTCAACCTGGGAA  
GZIPSVE02IEKVK TAAAGCGCGCGTAGGTGGTTAGTTAAGTTGGATGTGAAAGTCCCGGGCTCAACCTGGGAA  
\*\*\*\*\*

cluster CTGCATTCAAAGTACTGACTGACTAGAGTATGGTAGAGGGTGGTGAATTTCTGTGCAGCG  
GZIPSVE02FH6HB CTGCATTCAAAGTACTGACTGACTAGAGTATGGTAGAGGGTGGTGAATTTCTGTGCAGCG  
GZIPSVE02IEKVK CTGCATTCAAAGTACTGACTGACTAGAGTATGGTAGAGGGTGGTGAATTTCTGTGCAGCG  
\*\*\*\*\*

cluster GTGAAATGCGTAGATATAGGAAGGAACACCAGTGGCGAAGGCGACCAC-TGGACTGATAC  
GZIPSVE02FH6HB GTGAAATGCGTAGATATAGGAAGGAACACCAGTGGCGAAGGCGACCAC-TGGACTGATAC  
GZIPSVE02IEKVK GTGAAATGCGTAGATATAGGAAGGAACACCAGTGGCGAAGGCGACCACCTGGACTGATAC  
\*\*\*\*\*

cluster TGACACTGAGGTGCGAAAGCGTGGGGAGCAAACAGGATTAGATACCCTGGTAGTCCACGC  
GZIPSVE02FH6HB TGACACTGAGGTGCGAAAGCGTGGGGAGCAAACAGGATTAGATACCCTGGTAGTCCACGC  
GZIPSVE02IEKVK TGACACTGAGGTGCGAAA-----  
\*\*\*\*\*

cluster CGTAAACGATGTCAA-TAGCCGTTGGGA  
GZIPSVE02FH6HB CGTAAACGATGTCAACTAGCCGTTGGGA  
GZIPSVE02IEKVK -----
