# Supplementary material for: Assessing the Consequences of Denoising Marker-Based Metagenomic Data
Source: PubMed Central journal article supplement (PMC3607570; doi:10.1371/journal.pone.0060458), 2013-03-25
Supplement: pone.0060458.s016.pdf [file pone.0060458.s016.pdf]

|                      | Reference reads (stage) | Query reads (stage) | Number of reads analyzed | Mean 3' gap (S.D.) | Substitutions | Insertions | Deletions | Total changes |
|----------------------|-------------------------|---------------------|--------------------------|--------------------|---------------|------------|-----------|---------------|
| <u>AmpliconNoise</u> |                         |                     |                          |                    |               |            |           |               |
| Filtering            | 0                       | 1A                  | 42,371                   | -38.2 (64.8)       | 68            | 663        | 457       | 1,188         |
| PyroNoise            | 1A                      | 2A                  | 42,371                   | 27.3 (56.2)        | 8,575         | 4,673      | 3,315     | 16,563        |
| Accordion effect     | 0                       | 2A                  | 42,371                   | -10.4 (38.0)       | 18,004        | 13,025     | 35,514    | 66,543        |
| Truncation           | 2A                      | 3A                  | 42,371                   | -15.5 (9.8)        | 0             | 0          | 0         | 0             |
| SeqNoise             | 3A                      | 4A                  | 42,371                   | 4.3 (27.0)         | 23,552        | 2,123      | 1,635     | 27,310        |
| Perseus              | 4A                      | 5A                  | 41,583                   | 0.0 (0.0)          | 0             | 0          | 0         | 0             |
| Net results          | 0                       | 5A                  | 41,583                   | -21.2 (25.6)       | 40,794        | 13,397     | 34,647    | 88,838        |
| CleanOpt (trunc)     | 0                       | 1A                  | 42,244                   | -38.8 (64.2)       | 0             | 0          | 340       | 340           |
| PyroNoise            | 1A                      | 2A                  | 42,244                   | 25.9 (55.6)        | 8,553         | 4,893      | 2,858     | 16,304        |
| Accordion effect     | 0                       | 2A                  | 42,244                   | -12.3 (37.7)       | 17,680        | 12,545     | 34,528    | 64,753        |
| CleanOpt (no trunc)  | 0                       | 1A                  | 46,307                   | 0.0 (0.0)          | 186           | 73         | 2,302     | 2,561         |
| PyroNoise            | 1A                      | 2A                  | 46,307                   | 1.4 (9.9)          | 11,565        | 13,004     | 14,525    | 39,094        |
| Accordion effect     | 0                       | 2A                  | 46,307                   | 1.4 (9.9)          | 11,373        | 11,258     | 14,959    | 37,590        |
| <u>QIIME</u>         |                         |                     |                          |                    |               |            |           |               |
| split_libraries      | 0                       | 1B                  | 44,918                   | -18.8 (49.2)       | 413           | 0          | 0         | 413           |
| Pre-clustering       | 1B                      | 2B                  | 44,918                   | 19.3 (49.4)        | 82            | 867        | 332       | 1,281         |
| Accordion effect     | 0                       | 2B                  | 44,918                   | 0.4 (5.0)          | 716           | 3,040      | 1,643     | 5,399         |
| denoiser             | 2B                      | 3B                  | 44,918                   | 1.2 (12.8)         | 161,485       | 46,383     | 69,031    | 276,899       |
| ChimeraSlayer        | 3B                      | 4B                  | 44,627                   | 0.0 (0.0)          | 0             | 0          | 0         | 0             |
| Net results          | 0                       | 4B                  | 44,627                   | 1.6 (13.7)         | 161,221       | 45,888     | 67,288    | 274,397       |
| <u>mothur</u>        |                         |                     |                          |                    |               |            |           |               |
| trim.flows           | 0                       | 1C                  | 38,989                   | -155.7 (19.0)      | 4             | 169        | 92        | 265           |
| shhh.flows           | 1C                      | 2C                  | 38,989                   | 0.0 (0.1)          | 3,948         | 1,583      | 947       | 6,478         |
| Accordion effect     | 0                       | 2C                  | 38,989                   | -155.7 (19.0)      | 4,031         | 1,541      | 1,185     | 6,757         |
| trim.seqs            | 2C                      | 3C                  | 38,989                   | 0.0 (0.0)          | 0             | 0          | 0         | 0             |
| shhh.seqs            | 3C                      | 4C                  | 38,989                   | 0.0 (1.2)          | 8,904         | 377        | 267       | 9,548         |
| chimera.uchime       | 4C                      | 5C                  | 38,423                   | 0.0 (0.0)          | 0             | 0          | 0         | 0             |
| Net results          | 0                       | 5C                  | 38,423                   | -155.7 (19.1)      | 12,902        | 1,877      | 1,550     | 16,329        |
| <u>SLP</u>           |                         |                     |                          |                    |               |            |           |               |
| split_libraries      | 0                       | 1D                  | 42,511                   | -23.5 (9.9)        | 0             | 0          | 0         | 0             |
| slp.pl               | 1D                      | 2D                  | 42,511                   | -2.7 (12.2)        | 67,131        | 9,966*     | 16,244*   | 93,341        |
| Net results          | 0                       | 2D                  | 42,511                   | -26.2 (10.3)       | 67,159        | 10,212*    | 16,705*   | 94,076        |
| <u>Acacia</u>        |                         |                     |                          |                    |               |            |           |               |
| Net results          | 0                       | 1E                  | 45,184                   | -3.4 (19.8)        | 10,883        | 4,535      | 5,178     | 20,596        |

All data are in units of base pairs, except those indicated by \* (units of events).
