# Supplementary material for: Assessing the Consequences of Denoising Marker-Based Metagenomic Data
Source: PubMed Central journal article supplement (PMC3607570; doi:10.1371/journal.pone.0060458), 2013-03-25
Supplement: pone.0060458.s025.pdf [file pone.0060458.s025.pdf]

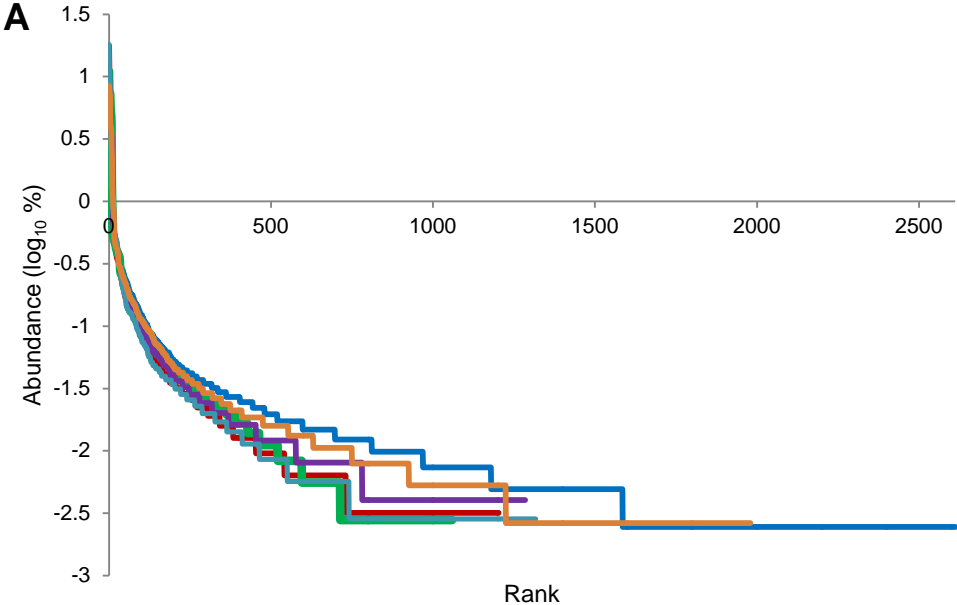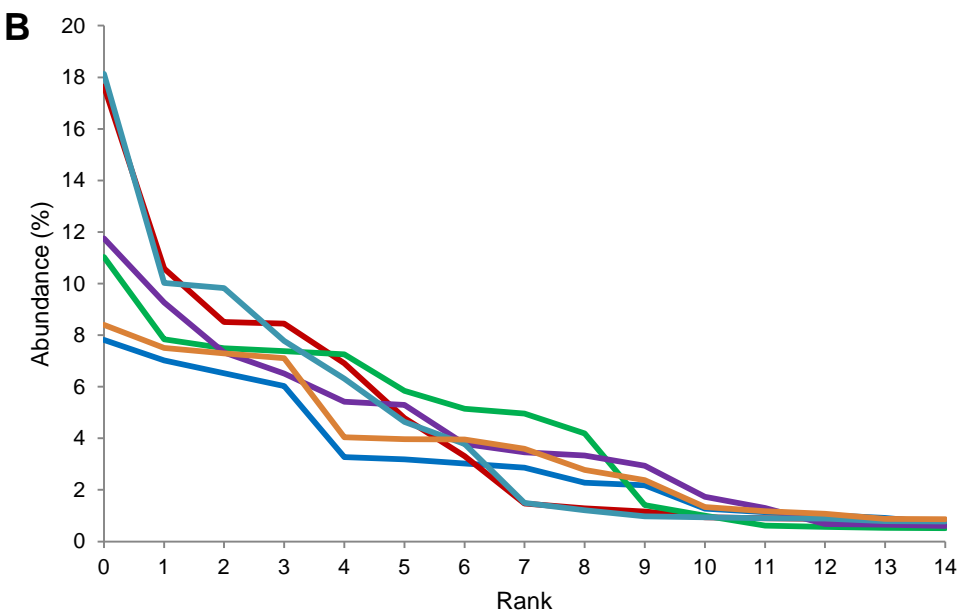

— Original reads — AmpliconNoise — QIIME  
— mothur — SLP — Acacia
